# Supplementary material for: Functional Characterization of the M36 Metalloprotease FgFly1 in Fusarium graminearum
Source: MDPI journal article supplement (doi:10.3390/jof8070726), 2022-07-12
Supplement: s1 [file s1]

# Supplementary

Table S1. PCR primers used in this study.

| NAME            | SEQUENCE(5'-3')                                               |
|-----------------|---------------------------------------------------------------|
| FLY1-UP-F       | TCTTGTGTCATCAGGCACTG                                          |
| FLY1-UP-R       | CAAAATAGGCATTGATGTGTTGACCTCCGTTGAGAACGAGTGAGG<br>ATT          |
| FLY1-DOWN-F     | CTCGTCCGAGGGCAAAGGAATAGAGTAGATATGATACGATGGAAT<br>GTT          |
| FLY1-DOWN-R     | AGAGTGGAGCGCTGCTCAGA                                          |
| FLY1-ID-F       | CCATGATCGCGTGCTTGAAC                                          |
| FLY1-ID-R       | CGCTGGTTATCAATCTCTGC                                          |
| FLY1-NEST-F     | GAAGCTCGCCCGGTAGCGTC                                          |
| FLY1-NEST-R     | CCAGTACAACGCTTTCCACC                                          |
| NP-FLY1-GFP-F   | ACTCACTATAGGGCGAATTGGGTAATAAATTGGTTAGACGAGAT<br>ATAGGCTCTTG   |
| NP-FLY1-GFP-R   | CACCACCCCGGTGAACAGCTCCTCGCCCTTGCTCACGCAGCCAGA<br>AGGCAGGGTGAA |
| ID-FLY1-GFP-F   | TCCATGAAGCTCGTCATGGAC                                         |
| ID-FLY1-GFP-R   | GTCAGCTTGCCGTAGGTGGCA                                         |
| CYFP-FLY1-F     | CTAGTCGACTCTAGCCTCGAGATGGCACCCAACGCATCGCC                     |
| CYFP-FLY1-R     | ATCGTATGGGTACATCCTAGGGCAGCCAGAAGGCAGGGTGAA                    |
| NYFP-CABT-F     | TCTGAGGAGGATCTTCTAGGATGAATGTGATTCAATATTA                      |
| NYFP-CABT-R     | GGGAGGCCTGGATCGACTAGTGCAGCAAATACATACACCAG                     |
| PPR3N-FLY1-F    | GACGCGTGGCCATTACGGCCATGCGCTTCTCCGATAGTCT                      |
| PPR3N-FLY1-R    | CTCGAGAGGCCGAGGCGGCCGCGCAGCCAGAAGGCAGGGTGAA                   |
| PBT3-FLY1-F     | ATGTAATGGCCATTACGGCCATGCGCTTCTCCGATAGTCT                      |
| PBT3-FLY1-R     | TGCAGATGGCCGAGGCGGCCCGCAGCCAGAAGGCAGGGTGAA                    |
| PBT3-ΔSPFLY1-F  | ATGTAATGGCCATTACGGCCATGGCACCCAACGCATCGCC                      |
| PPR3-CABT-F     | GACGCGTGGCCATTACGGCCATGAATGTGATTCAATATTA                      |
| PPR3-CABT-R     | CTCGAGAGGCCGAGGCGGCCGCGCAGCAAATACATACACCAG                    |
| PBT3-CABT-F     | ATGTAATGGCCATTACGGCCATGAATGTGATTCAATATTA                      |
| PBT3-CABT-R     | TGCAGATGGCCGAGGCGGCCCGCAGCAAATACATACACCAG                     |
| NLUC-CABT-F     | GAACACGGGGGACGAGCTCGGTACCATGAATGTGATTCAATATTA                 |
| NLUC-CABT-R     | GCCTCAGTCGACGCGTTGTGGATCCGCAGCAAATACATACACCAG                 |
| CLUC-FLY1-F     | CTCGTACGCGTCCCGGGGCGGTACCATGGCACCCAACGCATCGCC                 |
| CLUC-FLY1-R     | GCCTCAGTCGACGCGTTGTGGATCCGCAGCCAGAAGGCAGGGTGA<br>A            |
| PSUC2-FLY1-F    | TCCAAGCTCGGAATTTAATTAAGAATTCATGCGCTTCTCCGATAG<br>TCT          |
| PSUC2-FLY1-R    | CGACTCACTATAGGGAGAACCTCGAGATGGGCACCGGCCAGGCCG<br>G            |
| PBIN-NSP-FLY1-F | CCCCGGGGTTCGACGGATCCATGGCACCCAACGCATCGCC                      |
| PBIN-FLY1-F     | CCCCGGGGTTCGACGGATCCATGCGCTTCTCCGATAGTCT                      |
| PBIN-FLY1-R     | CTCTAGTTCATCTAGAGGATCCGCAGCCAGAAGGCAGGGTGA                    |
| CLUC-JC-F       | GAGTTGTGTTTGTGGACGAAGTACC                                     |
| CLUC-JC-R       | TTCCATTTACAGTTCGATAGCG                                        |
| NLUC-JC-F       | TTGGAGAGAACACGGGGGACG                                         |
| NLUC-JC-R       | TTGGAGAGAACACGGGGGACG                                         |
| NLUC-JC-R       | CAGGGCGTATCTCTTCATAGCC                                        |
| RT-TRI1-F       | GATGTTCTTCTCGACAGCGT                                          |
| RT-TRI1-R       | CACTGGTCGAAGATAGCTGG                                          |
| RT-TRI3-F       | TGTTACGATCAATGGCTTGG                                          |
| RT-TRI3-R       | TCCTCGTTGTAGTTTGCATCA                                         |

|            |                       |
|------------|-----------------------|
| RT-TRI4-F  | ACGTGTGGCTACTCAGGAGA  |
| RT-TRI4-R  | TGGAATTGCCTTGGGGTA    |
| RT-TRI5-F  | ATGGCGGATCTATCTATTAC  |
| RT-TRI5-R  | CCATTCATACGACGAAGGAAT |
| RT-TRI6-F  | AAATGCCCATTCCTAGTTG   |
| RT-TRI6-R  | ATCTCGCATGTTATCCACCCT |
| RT-TRI7-F  | TACCGTCGTCTTCAAAACCA  |
| RT-TRI7-R  | ACGCCAATGGTGTTCACAAA  |
| RT-TRI8-F  | ATATAACGGTACCCCCAGATG |
| RT-TRI8-R  | TGTTTGTAGGACACTTCCGGT |
| RT-TRI9-F  | CCGCTAAACTGATCGACTCAT |
| RT-TRI9-R  | CCCATATGGTAGCGCATAAA  |
| RT-TRI10-F | TCCCAACCTTTCAGAGGTTCA |
| RT-TRI10-R | TGATCCGTCAAGTCTTCCCAT |
| RT-TRI11-F | TGAGAACGACATGTGGGCAAT |
| RT-TRI11-R | AGGCTTGTCCATGCAAGAT   |
| RT-TRI12-F | ACGAACAGCACTGCTACGGT  |
| RT-TRI12-R | TTCCTGCTTGTGACTCCAAT  |
| RT-TRI13-F | ACGCAGATCCTGGGATATCA  |
| RT-TRI13-R | CAGCCCAGTATTTGCCAAA   |
| RT-TRI14-F | AACTCCCGTTGTGATCAAGCA |
| RT-TRI14-R | AACAGTAATGTTGGCACCGT  |
| RT-ACTIN-F | ATCCACGTCACCACTTCAA   |
| RT-ACTIN-R | TGCCTTGAGATCCACATTTG  |

Table S2. Growth rate, average disease severity and plant infection between different types of strain

| Strain           | Growth rate (mm d <sup>-1</sup> ) <sup>1)</sup> | Average disease severity <sup>2)</sup> | Maize silk lesion length (cm) <sup>3)</sup> | Coleoptile length(cm) <sup>4)</sup> | Lesion |
|------------------|-------------------------------------------------|----------------------------------------|---------------------------------------------|-------------------------------------|--------|
| PH-1             | 11.5±0.3a                                       | 3.17a                                  | 10±0.2a                                     | 1.2±0.12a                           |        |
| <i>ΔFgFly1</i>   | 9.2±0.2b                                        | 1.13b                                  | 4.2±0.1b                                    | 0.3±0.05b                           |        |
| <i>ΔFgFly1-C</i> | 11.4±0.3a                                       | 3.20a                                  | 9.8±0.3a                                    | 1.2±0.10a                           |        |

<sup>1)</sup> Daily extension in colony radius on potato dextrose agar (PDA) plates.

<sup>2)</sup> Average disease severity was rated by the disease severity of symptomatic spikelets per head at 14 days post-inoculation. (Total 30 spikes)

<sup>3)</sup> The average lesion length 7 days after infection of maize silk. (Total 10 spikes)

<sup>4)</sup> The average lesion length 7 days after infection of coleoptile. (Total 10 spikes)

**A**

**A First Round PCR:**

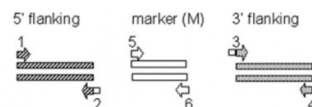

**B Second Round PCR:**

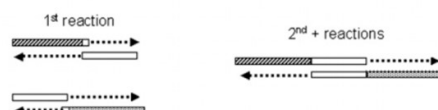

**C Third Round PCR:**

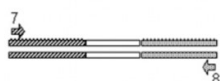

**B**

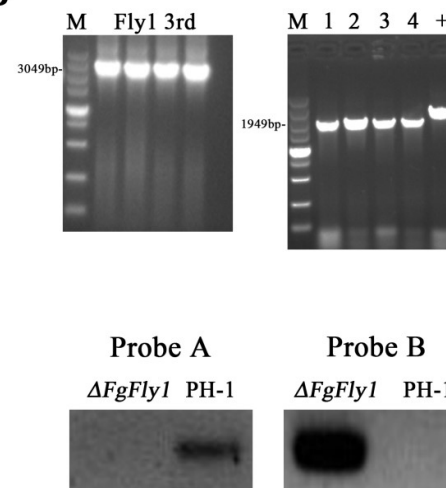

Figure S1.A. Schematic diagram of Double-joint PCR. B. Fly1 mutants were screened by PCR analysis and Southern blot.

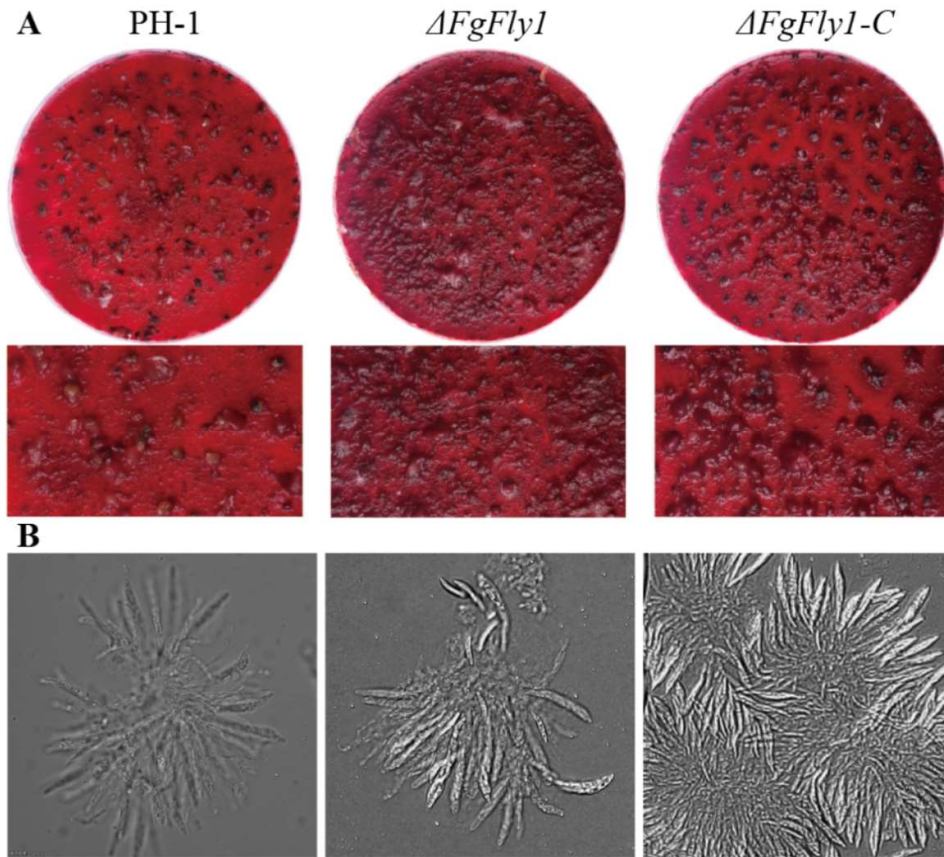

Figure S2. Analysis of ascospores discharge from PH-1,  $\Delta FgFly1$  and  $\Delta FgFly1-C$  on carrot plate for 15 d. A. Carrot agar cultures of the PH-1,  $\Delta FgFly1$  and  $\Delta FgFly1-C$  were examined 15 d post-fertilization (dpf). B. Ascospores of the PH-1,  $\Delta FgFly1$  and  $\Delta FgFly1-C$  were examined by differential interference contrast (DIC). Bar= 10  $\mu m$ .
